# Supplementary material for: Reflection colour changes in cholesteric liquid crystals after the addition and photochemical isomerization of mesogenic azobenzenes tethered to sugar alcohols
Source: Royal Society of Chemistry journal article supplement (doi:10.1039/b900890j), 2009-01-01
Supplement: b900890j.pdf [file b900890j.pdf]

Supplementary

**AzMe.** Purified through recrystallization from MeOH: yield: 80.8%.  $^1\text{H}$  NMR ( $\text{CDCl}_3$ ,  $\delta$ ): 0.89 (t,  $J = 6.8$  Hz, 3H,  $\text{CH}_3$ ), 1.31 (s, 16H,  $\text{CH}_2$ ), 1.48 (br s, 2H,  $\text{CH}_2\text{C}_2\text{H}_4\text{OAr}$ ), 1.58-1.66 (m, 4H,  $\text{CH}_2\text{CH}_2\text{Ar}$ ,  $\text{CH}_2\text{CH}_2\text{COO}$ ), 1.82 (q,  $J = 7.0$  Hz, 2H,  $\text{CH}_2\text{CH}_2\text{OAr}$ ), 2.31 (t,  $J = 7.5$  Hz, 2H,  $\text{CH}_2\text{COO}$ ), 2.67 (t,  $J = 7.6$  Hz, 2H,  $\text{CH}_2\text{Ar}$ ), 4.03 (t,  $J = 6.6$  Hz, 2H,  $\text{CH}_2\text{OAr}$ ), 6.99 (d,  $J = 9.0$  Hz, 2H, ArH), 7.29 (d,  $J = 8.4$  Hz, 2H, ArH), 7.79 (d,  $J = 8.3$  Hz, 2H, ArH), 7.88 (d,  $J = 9.0$  Hz, 2H, ArH). **Elemental analysis.** Found: C, 74.61; H, 9.15; N, 5.93. Calcd. for  $\text{C}_{30}\text{H}_{44}\text{N}_2\text{O}_3$ : C, 74.96; H, 9.23; N, 5.83 %.

**AzEg.** Purified through column chromatography ( $\text{SiO}_2$ ;  $\text{CH}_2\text{Cl}_2$ /hexane, 7:3): yield: 42.2%.  $^1\text{H}$  NMR ( $\text{CDCl}_3$ ,  $\delta$ ): 0.88 (t,  $J = 6.7$  Hz, 6H,  $\text{CH}_3$ ), 1.31 (s, 32H,  $\text{CH}_2$ ), 1.46 (s, 4H,  $\text{CH}_2\text{C}_2\text{H}_4\text{OAr}$ ), 1.58-1.70 (m, 8H,  $\text{CH}_2\text{CH}_2\text{Ar}$ ,  $\text{CH}_2\text{CH}_2\text{COO}$ ), 1.75-1.87 (m, 4H,  $\text{CH}_2\text{CH}_2\text{OAr}$ ), 2.33 (t,  $J = 7.5$  Hz, 4H,  $\text{CH}_2\text{COO}$ ), 2.67 (t,  $J = 7.7$  Hz, 4H,  $\text{CH}_2\text{Ar}$ ), 4.02 (t,  $J = 6.5$  Hz, 4H,  $\text{CH}_2\text{OAr}$ ), 4.27 (s, 4H,  $\text{CH}_2$ ), 6.99 (d,  $J = 9.0$  Hz, 4H, ArH), 7.28 (d,  $J = 8.3$  Hz, 8H, ArH), 7.79 (d,  $J = 8.3$  Hz, 4H, ArH), 7.88 (d,  $J = 8.9$  Hz, 4H, ArH). MALDI-TOF-MS; calcd. for  $[\text{M} + \text{H}]^+$ ,  $[\text{M} + \text{Na}]^+$ , and  $[\text{M} + \text{K}]^+$ : 959.7, 981.6, and 997.6, respectively; found 960.2, 982.2, and 998.1, respectively. **Elemental analysis.** Found: C, 75.26; H, 8.97; N, 5.78. Calcd. for  $\text{C}_{60}\text{H}_{86}\text{N}_4\text{O}_6$ : C, 75.12; H, 9.04; N, 5.84 %.

**AzTh.** Purified through column chromatography ( $\text{SiO}_2$ ;  $\text{CH}_2\text{Cl}_2$ /EtOAc, 19:1); yield: 49.2%.  $^1\text{H}$  NMR ( $\text{CDCl}_3$ ,  $\delta$ ): 0.88 (t,  $J = 6.9$  Hz, 12H,  $\text{CH}_3$ ), 1.30 (s, 64H,  $\text{CH}_2$ ), 1.42-1.50 (m, 64H,  $\text{CH}_2\text{C}_2\text{H}_4\text{OAr}$ ), 1.56-1.70 (m, 16H,  $\text{CH}_2\text{CH}_2\text{Ar}$ ,  $\text{CH}_2\text{CH}_2\text{COO}$ ), 1.80 (q,  $J = 6.9$  Hz, 8H,  $\text{CH}_2\text{CH}_2\text{OAr}$ ), 2.29 (t,  $J = 7.7$  Hz, 4H,  $\text{CH}_2\text{COO}$ ), 2.34 (t,  $J = 7.5$  Hz, 4H,  $\text{CH}_2\text{COO}$ ), 2.66 (t,  $J = 7.7$  Hz, 8H,  $\text{CH}_2\text{Ar}$ ), 4.01 (t,  $J = 6.5$  Hz, 8H,  $\text{CH}_2\text{OAr}$ ), 4.05 (br d,  $J = 12$  Hz 2H, H-1a, H-4a), 4.34 (br d,  $J = 12$  Hz 2H, H-1b, H-4b), 5.34 (br s, 2H, H-2, H-3), 6.98 (d,  $J = 8.9$  Hz 8H, ArH), 7.28 (d,  $J = 8.4$  Hz 14H, ArH), 7.79 (d,  $J = 8.3$  Hz H, ArH), 7.88 (d,  $J = 9.0$  Hz H, ArH). MALDI-TOF-MS; calcd. for  $[\text{M} + \text{H}]^+$ ,  $[\text{M} + \text{Na}]^+$ , and  $[\text{M} + \text{K}]^+$ : 1917.3, 1939.3, and 1955.3, respectively; found: 1917.8, 1949.8, and 1955.7, respectively. **Elemental analysis.** Found: C, 75.23; H, 8.87; N, 5.66. Calcd. for  $\text{C}_{120}\text{H}_{170}\text{N}_8\text{O}_{12}$ : C, 75.20; H, 8.94; N, 5.85 %.

**AzEr.** Purified through column chromatography ( $\text{SiO}_2$ ;  $\text{CH}_2\text{Cl}_2$ /EtOAc, 9:1); yield: 43.4%.  $^1\text{H}$  NMR ( $\text{CDCl}_3$ ,  $\delta$ ): 0.88 (t,  $J = 6.9$  Hz, 12H,  $\text{CH}_3$ ), 1.30 (s, 64H,  $\text{CH}_2$ ),

1.40-1.52 (m, 8H,  $\underline{\text{CH}}_2\text{C}_2\text{H}_4\text{OAr}$ ), 1.55-17.0 (m, 16H,  $\underline{\text{CH}}_2\text{CH}_2\text{COO}$ ,  $\underline{\text{CH}}_2\text{CH}_2\text{Ar}$ ), 1.80 (q,  $J = 7.0$  Hz, 8H,  $\text{CH}_2\text{CH}_2\text{OAr}$ ), 2.26 (t, 4H,  $J = 7.5$  Hz,  $\text{CH}_2\text{COO}$ ), 2.33 (t,  $J = 7.6$  Hz, 4H,  $\text{CH}_2\text{COO}$ ), 2.66 (t,  $J = 7.7$  Hz, 8H,  $\text{CH}_2\text{Ar}$ ), 4.01 (t,  $J = 6.5$  Hz, 8H,  $\text{CH}_2\text{OAr}$ ), 4.15 (br d,  $J = 12$  Hz, 2H, H-1a, H-4a), 4.35 (br d,  $J = 12$  Hz, 2H, H-1b, H-4b), 5.28 (br s, 2H, H-2, H-3), 6.98 (d,  $J = 9.0$  Hz, 8H, ArH), 7.28 (d,  $J = 8.4$  Hz, 8H, ArH), 7.79 (d,  $J = 8.4$  Hz, 4H, ArH), 7.88 (d,  $J = 9.0$  Hz, 4H, ArH). MALDI-TOF-MS: calcd. for  $[\text{M} + \text{H}]^+$ ,  $[\text{M} + \text{Na}]^+$ , and  $[\text{M} + \text{K}]^+$ : 1917.3, 1939.3, and 1955.3, respectively; found: 1917.8, 1939.8, and 1955.8, respectively. **Elemental analysis. Found: C, 75.39; H, 8.78; N, 5.73. Calcd. for  $\text{C}_{120}\text{H}_{170}\text{N}_8\text{O}_{12}$ : C, 75.20; H, 8.94; N, 5.85 %.**

**AzMn.** Purified twice through column chromatography ( $\text{SiO}_2$ ; first with  $\text{CH}_2\text{Cl}_2$ /hexane, 1:1; then with  $\text{CH}_2\text{Cl}_2$ /hexane/EtOAc, 1:1:0.04); yield: 33.9%.  $^1\text{H}$  NMR ( $\text{CDCl}_3$ ,  $\delta$ ): 0.88 (t,  $J = 6.8$  Hz, 18H,  $\text{CH}_3$ ), 1.31 (s, 96H,  $\text{CH}_2$ ), 1.45 (br s, 12H,  $\underline{\text{CH}}_2\text{C}_2\text{H}_4\text{COO}$ ), 1.62 (m, 24H,  $\underline{\text{CH}}_2\text{CH}_2\text{Ar}$ ,  $\underline{\text{CH}}_2\text{CH}_2\text{COO}$ ), 1.79 (br s, 12H,  $\underline{\text{CH}}_2\text{CH}_2\text{OAr}$ ), 2.28 (t,  $J = 7.9$  Hz 6H,  $\text{CH}_2\text{COO}$ ), 2.33 (t,  $J = 8.0$  Hz, 6H,  $\text{CH}_2\text{COO}$ ), 2.66 (t,  $J = 7.7$  Hz, 12H,  $\text{CH}_2\text{Ar}$ ), 3.99 (t,  $J = 6.3$  Hz, 12H,  $\text{CH}_2\text{OAr}$ ), 4.02 (br dd,  $J = 5$ , 12 Hz, 2H, H-1a, H-6a), 4.25 (br d,  $J = 12.3$  Hz, 2H, H-1b, H-6b), 5.09 (br s, 2H, H-2, H-5), 5.47 (d,  $J = 8.2$  Hz, 2H, H-3, H-4), 6.96 (d,  $J = 9.1$  Hz, 12H, ArH), 7.27 (d,  $J = 8.2$  Hz, 12H, ArH), 7.78 (d,  $J = 8.2$  Hz, 12H, ArH), 7.87 (d,  $J = 8.9$  Hz, 12H, ArH). MALDI-TOF-MS: 2874.9  $[\text{M} + \text{H}]^+$ , 2896.9  $[\text{M} + \text{Na}]^+$ , 2912.9  $[\text{M} + \text{K}]^+$ . **Elemental analysis. Found: C, 75.46; H, 8.85; N, 5.77. Calcd. for  $\text{C}_{180}\text{H}_{254}\text{N}_{12}\text{O}_{18}$ : C, 75.22; H, 8.91; N, 5.85 %.**

**AzIn.** Purified twice through column chromatography ( $\text{SiO}_2$ ;  $\text{CH}_2\text{Cl}_2$ ); yield: 19.6%.  $^1\text{H}$  NMR ( $\text{CDCl}_3$ ,  $\delta$ ): 0.88 (t,  $J = 6.7$  Hz 18H,  $\text{CH}_3$ ), 1.27 and 1.31 (s  $\times$  2, 96H,  $\text{CH}_2$ ), 1.40–1.55 (m, 24H,  $\underline{\text{CH}}_2\text{C}_2\text{H}_4\text{OAr}$ ,  $\underline{\text{CH}}_2\text{CH}_2\text{COO}$ ), 1.58-1.70 (m, 12H,  $\underline{\text{CH}}_2\text{CH}_2\text{Ar}$ ), 1.79 (q,  $J = 6.2$  Hz 12H,  $\underline{\text{CH}}_2\text{CH}_2\text{OAr}$ ), 2.21 (t,  $J = 7.5$  Hz 12H,  $\text{CH}_2\text{COO}$ ), 2.66 (t,  $J = 7.7$  Hz 12H,  $\text{CH}_2\text{Ar}$ ), 3.98 (t,  $J = 6.5$  Hz 12H,  $\text{CH}_2\text{OAr}$ ), 5.26 (s, 6H, CH), 6.97 (d,  $J = 9.0$  Hz 12H, ArH), 7.26 (d,  $J = 8.3$  Hz 12H, ArH), 7.78 (d,  $J = 8.3$  Hz 12H, ArH), 7.87 (d,  $J = 9.0$  Hz 12H, ArH). MALDI-TOF-MS: calcd. for  $[\text{M} + \text{Na}]^+$  and  $[\text{M} + \text{K}]^+$ : 2894.9 and 2910.9, respectively; found: 2895.7 and 2911.6, respectively. **Elemental analysis. Found: C, 75.14; H, 8.85; N, 5.71. Calcd. for  $\text{C}_{180}\text{H}_{252}\text{N}_{12}\text{O}_{18}$ : C, 75.28; H, 8.84; N, 5.85 %.**

**AzMnC5.** Purified twice through column chromatography ( $\text{SiO}_2$ ; first with

CH<sub>2</sub>Cl<sub>2</sub>/EtOH, 100:1; then with CH<sub>2</sub>Cl<sub>2</sub>/hexane/EtOAc, 1:1:0.12); yield: 37.0%. <sup>1</sup>H NMR (CDCl<sub>3</sub>, δ): 0.88 (t, *J* = 6.8 Hz, 18H, CH<sub>3</sub>), 1.31 (s, 36H, CH<sub>2</sub>), 1.40–1.86 (m, 48H, CH<sub>2</sub>C<sub>2</sub>H<sub>4</sub>OAr, CH<sub>2</sub>CH<sub>2</sub>Ar, CH<sub>2</sub>CH<sub>2</sub>COO, CH<sub>2</sub>CH<sub>2</sub>OAr), 2.26–2.44 (m, 12H, CH<sub>2</sub>COO), 2.65 (t, *J* = 7.7 Hz, 12H, CH<sub>2</sub>Ar), 3.99 (m, 14H, CH<sub>2</sub>OAr, H-1a, H-6a), 4.29 (br d, *J* = 12.4 Hz, 2H, H-1b, H-6b), 5.08–5.16 (m, 2H, H-2, H-5), 5.49 (d, *J* = 8.5 Hz, 2H, H-3, H-4), 6.93 (d, *J* = 9.2 Hz, 4H, ArH), 6.94 (d, *J* = 8.9 Hz, 4H, ArH), 6.96 (d, *J* = 9.1 Hz, 4H, ArH), 7.27 (d, *J* = 8.2 Hz, 12H, ArH), 7.77 (d, *J* = 8.3 Hz, 12H, ArH), 7.84 (d, *J* = 8.6 Hz, 8H, ArH), 7.86 (d, *J* = 8.9 Hz, 4H, ArH). MALDI-TOF-MS: calcd. for [M + H]<sup>+</sup>, [M + Na]<sup>+</sup>, and [M + K]<sup>+</sup>: 2453.4, 2475.5, and 2491.4, respectively; found: 2452.7, 2475.6, and 2491.5, respectively. **Elemental analysis.** Found: C, 73.55; H, 7.93; N, 6.77. Calcd. for C<sub>150</sub>H<sub>194</sub>N<sub>12</sub>O<sub>18</sub>: C, 73.44; H, 7.97; N, 6.85 %.

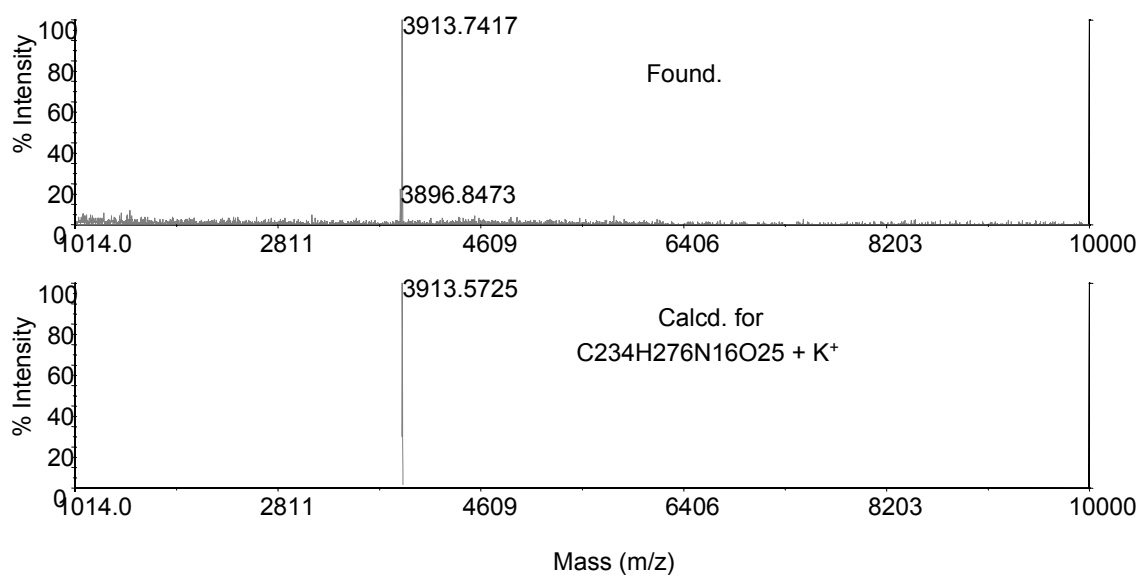

Figure S1. MALDI-TOF-MS spectra of **AzXyD**

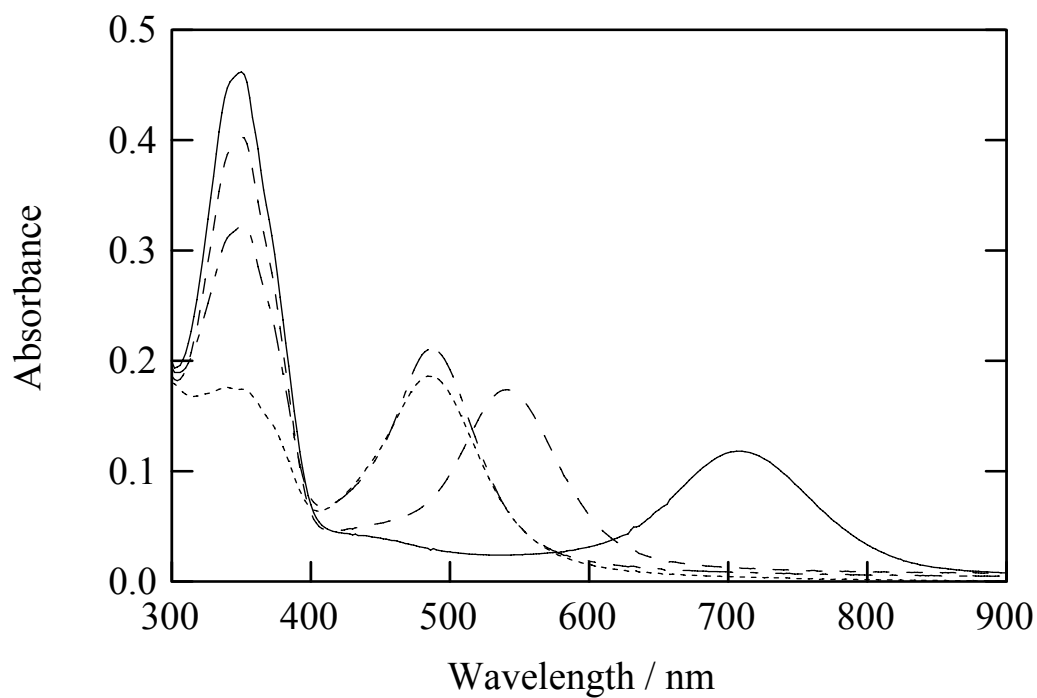

Figure S2. Absorption spectra of ChLC films of **CD8** doped with **AzMn** (2 wt%) quenched from 95°C after irradiation with UV light (365 nm) at 0 (solid line), 5 (dash line), 17 (dash-dot line), 100 mJ cm<sup>-2</sup> (dot line).
